# Supplementary material for: Designed pneumatic valve actuators for controlled droplet breakup and generation
Source: Royal Society of Chemistry journal article supplement (doi:10.1039/b915596a), 2010-01-01
Supplement: b915596a.pdf [file b915596a.pdf]

## Supporting Information of

Designed Pneumatic Valve Actuators for  
Controlled Droplet Breakup and Generation\*\*

Jae-Hoon Choi, Seung-Kon Lee, Jong-Min Lim, Seung-Man Yang\*, and Gi-Ra Yi\*

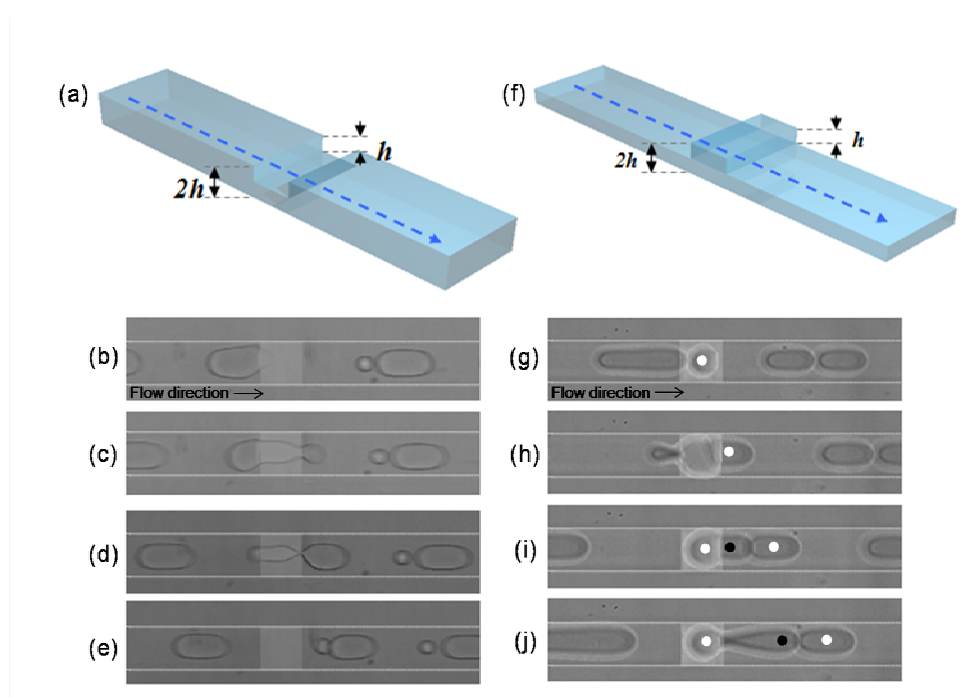

Fig. S1 (a) Schematic of a microchannel with the rectangular constriction at the top of the main channel of  $20\ \mu\text{m}$  in height. In the constriction area, the channel height is  $10\ \mu\text{m}$ . (b-e) Parallel white lines indicated fluidic channels ( $90\ \mu\text{m}$  wide), and bright area indicates constricted rectangular part ( $90 \times 90 \times 10\ \mu\text{m}$ ). Time-lapse images of droplet breakup in the rectangular pit. Time intervals taken between images are  $15\ \text{ms}$ . (f) Schematic of a microchannel with a protruded rectangular part at the top of the main channel ( $10\ \mu\text{m}$  high), in which droplets move in the direction of the arrows. (g-j) Parallel white lines indicated fluidic channels ( $90\ \mu\text{m}$  wide), and bright area indicates protruded rectangular part ( $90 \times 90 \times 20\ \mu\text{m}$ ). Time-lapse images of droplet breakup in the rectangular protrusion. Time intervals taken between images are  $30\ \text{ms}$ . White and black dots indicate remaining and leaving droplets at the protruded part, respectively. 'h' is  $10\ \mu\text{m}$ .
